# Supplementary material
Source: HighWire-hosted journal article supplement (doi:10.1101/rna.077289.120)
Supplement: Supplemental_Fig_1.pdf [file Supplemental_Fig_1.pdf]

A

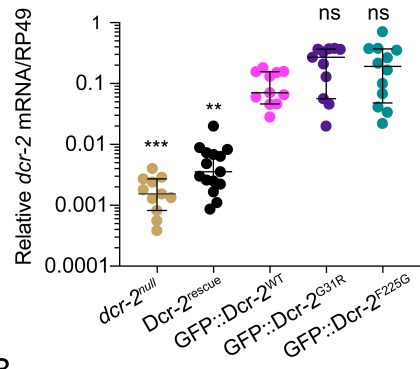

B

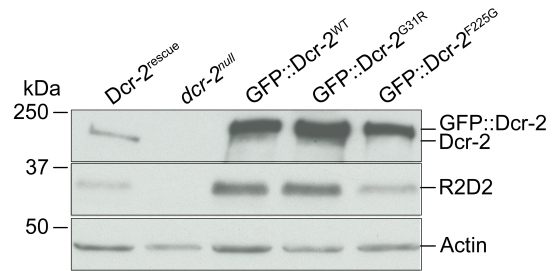

**S1:** mRNA and protein levels in Dcr-2 complemented flies. A) Levels of *dcr-2* mRNA from *Drosophila* testes quantified by RT-qPCR, normalized to the housekeeping gene RP49. The median and interquartile range are represented (mean  $\pm$  SD,  $n = 4$  with biological triplicates). Each dataset is compared to GFP::Dcr-2<sup>WT</sup>. Kruskal-Wallis test, \*\*,  $p < 0.01$ ; \*\*\*,  $p < 0.001$ ; ns, not significant. B) Western blot shows Dcr-2, R2D2, and Actin (loading control) expression levels in tested Dcr-2 genetic backgrounds. Protein extracts from flies contained different variants of Dcr-2 as indicated. In the *dcr-2*<sup>null</sup> background, the R2D2 protein was undetectable, presumably due to the known instability of R2D2 without Dcr-2 (Liu et al. 2003). When Dcr-2 protein is expressed, R2D2 was detected.
