# Supplementary material
Source: HighWire-hosted journal article supplement (doi:10.1101/rna.077289.120)
Supplement: Supplemental_Fig_2.pdf [file Supplemental_Fig_2.pdf]

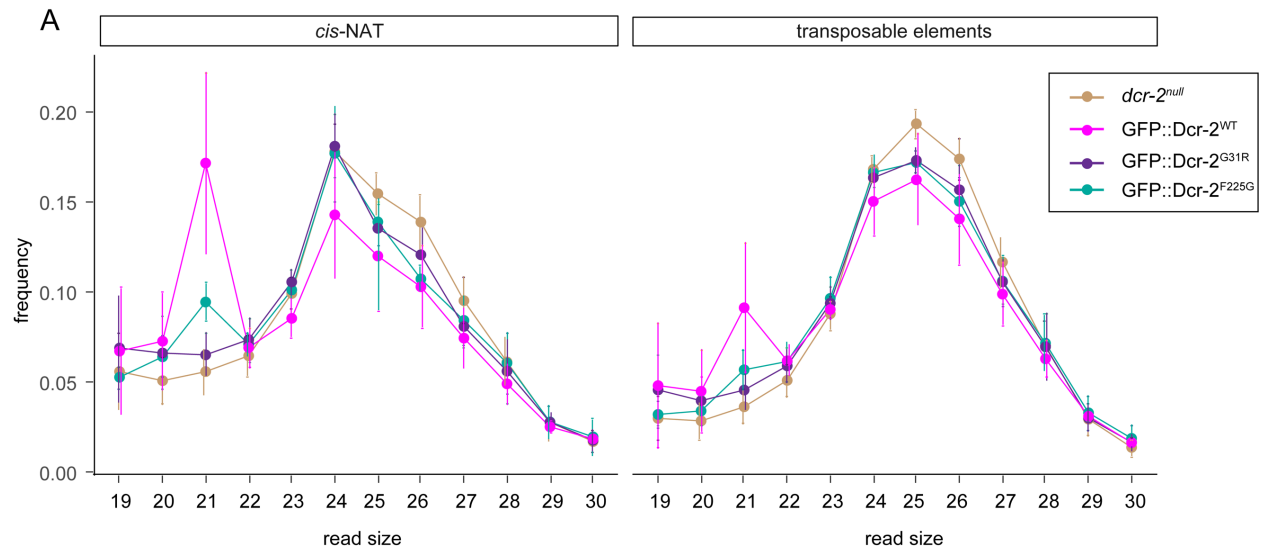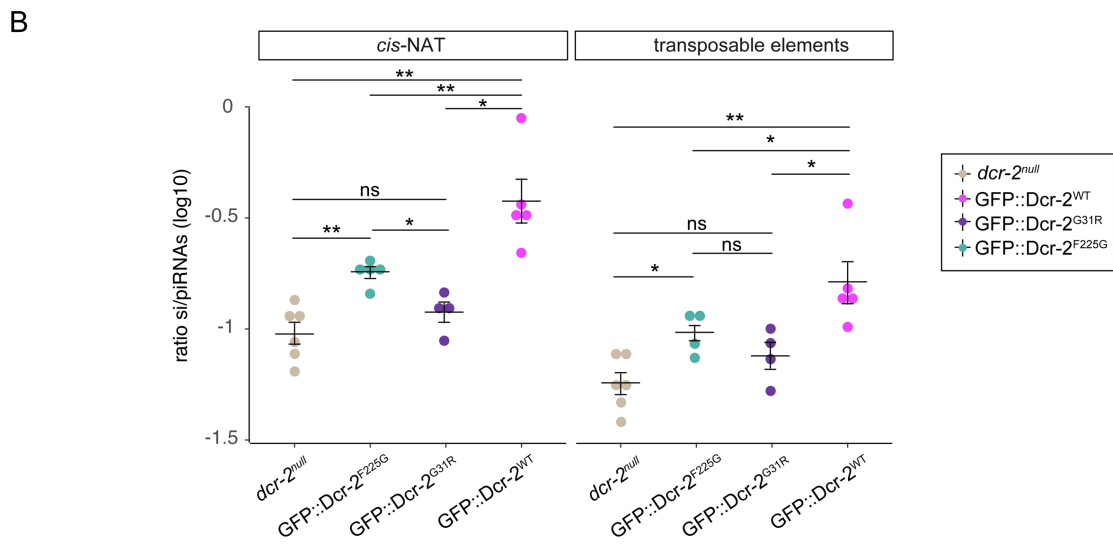

**S2:** Effects of Dcr-2 helicase mutations on the production of siRNAs from *cis*-NAT and TE precursors. A) Size distribution of endo-siRNAs derived from *cis*-NAT regions (left) or transposable elements (right) showing fraction of total reads of each size (length, nts). Mean shows average of at least four biological replicates, error bars, SD. The size distribution shows that *cis*-NATs and TEs generate both 21 nt siRNAs and 23-26 nt piRNAs, as evidenced by the two peaks. B) Ratio between siRNAs and piRNAs derived from *cis*-NAT or TEs shown in panel A. Statistical significance as evaluated with a student's t test indicated with a horizontal line connecting strains being compared: \*,  $p < 0.05$ ; \*\*,  $p < 0.01$ ; ns, not significant.
