# Supplementary material
Source: HighWire-hosted journal article supplement (doi:10.1101/rna.077289.120)
Supplement: Supplemental_Fig_3.pdf [file Supplemental_Fig_3.pdf]

**S3:** Additional replicate of Loqs-PD pulldown assay. Dcr-2 variants, as indicated, were incubated for 60 minutes with His-tagged Loqs-PD. Representative 4-15% SDS-polyacrylamide gel stained with Coomassie Brilliant Blue shows input proteins and proteins eluted after pulldown. Far left lane shows molecular weight markers with sizes labeled to the left of gel. Dcr-2<sup>K34A</sup> and Dcr-2<sup>RIII</sup> serve as additional controls, Dcr-2<sup>K34A</sup> with RIII mutations was used in Trettin et al. 2018. Dcr-2<sup>G31R</sup> and Dcr-2<sup>F225G</sup> purified through Strep-Tactin affinity chromatography only.
