# Supplementary material
Source: HighWire-hosted journal article supplement (doi:10.1101/rna.077289.120)
Supplement: Supplemental_Fig_4.pdf [file Supplemental_Fig_4.pdf]

A

DCV (500PFU)

VSV (5000PFU)

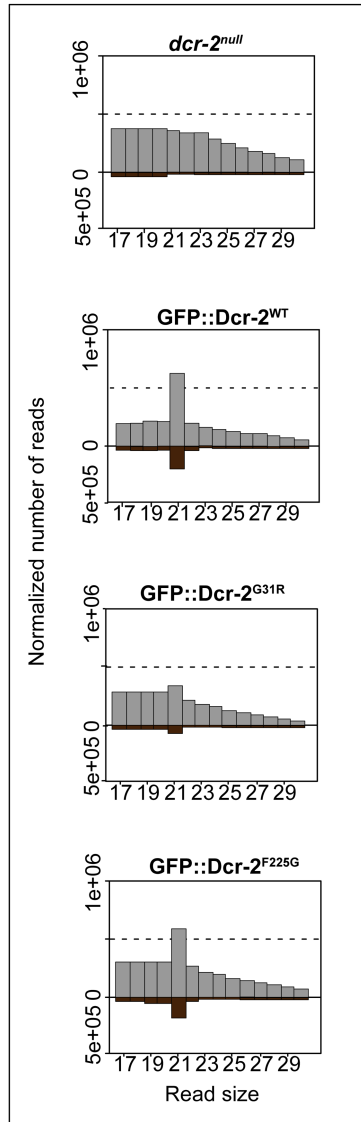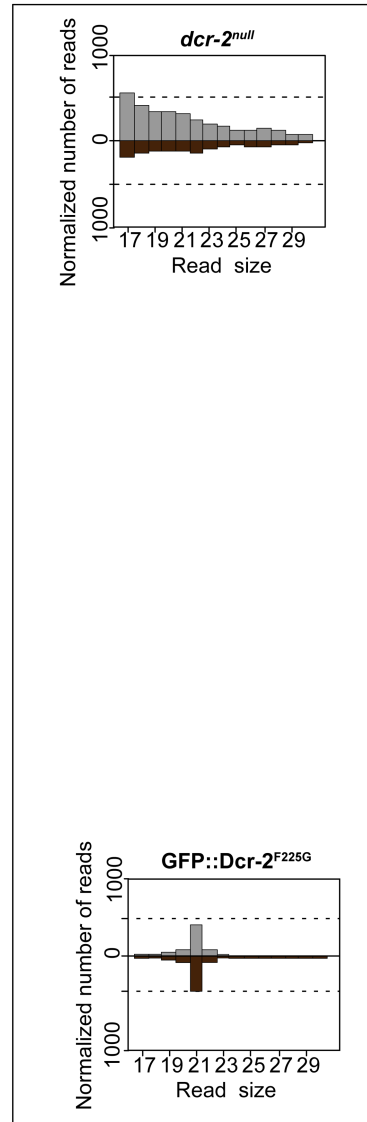

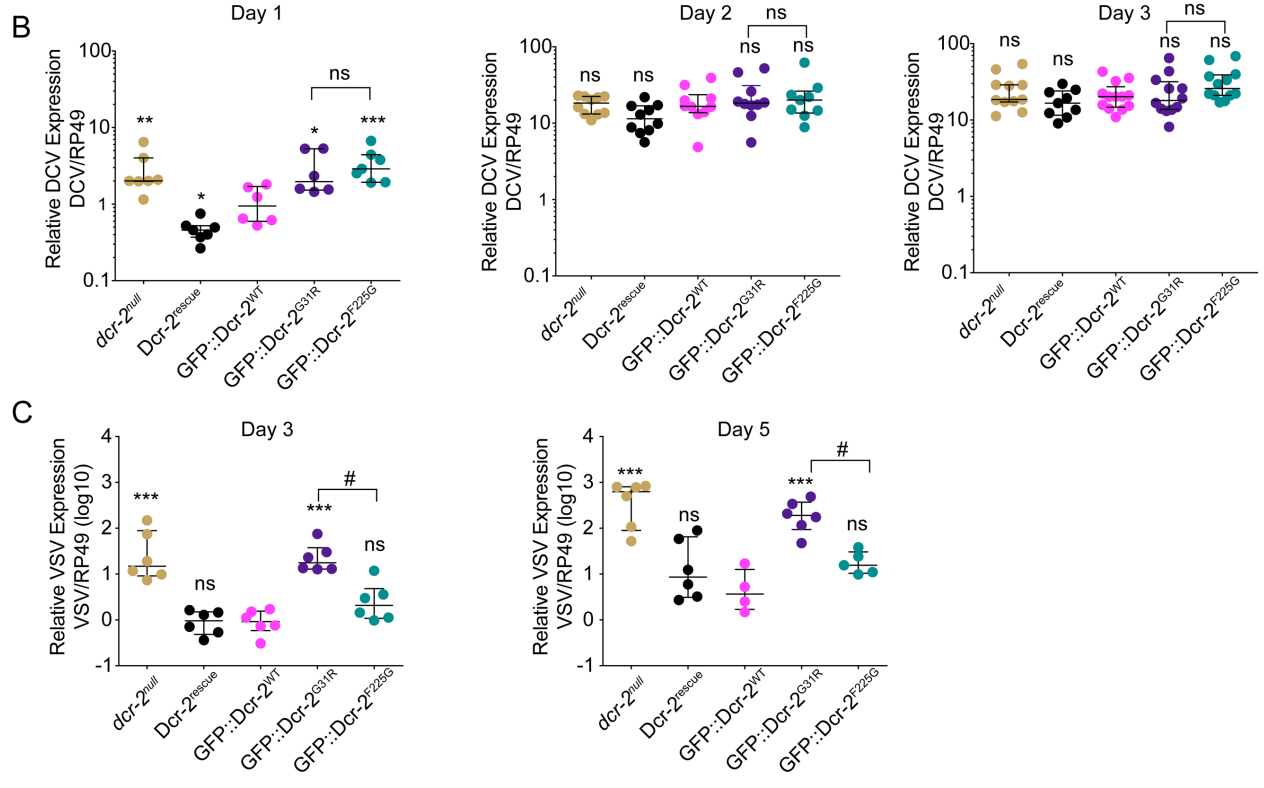

**S4:** Replicates of small RNA reads after DCV or VSV infection, and viral load. A) siRNA reads from an additional biological replicate mapping to DCV 3 DPI (left) and VSV five DPI (right), normalized to number of miRNA reads. Genome and antigenome reads are colored grey and dark brown respectively. B) Viral load for flies infected with DCV. Flies were infected with 500 plaque forming units (PFU) and viral load was measured 1-3 days post infection. C) Viral load for flies infected with VSV. Flies were infected with 5000 PFU and viral load was measured on day 3 and day 5 post infection. Viral load values were normalized to a housekeeping gene RP49 with six males and six females per sample at 25°C (mean ± SD,  $n = 3-4$  with biological replicates). Statistical test: one-way ANOVA with Tukey correction for multiple comparison. Asterisks indicate samples were compared to GFP::Dcr-2<sup>WT</sup>, and pound sign indicates comparison between helicase mutants. \*,  $p < 0.05$ ; \*\*,  $p < 0.01$ ; \*\*\*,  $p < 0.001$ ; ns, not significant. #,  $p < 0.05$ .
