# Supplementary material
Source: HighWire-hosted journal article supplement (doi:10.1101/rna.077289.120)
Supplement: Supplemental_Fig_6.pdf [file Supplemental_Fig_6.pdf]

**A**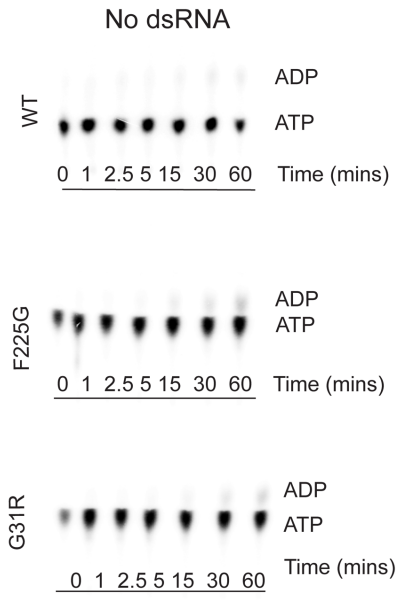**B**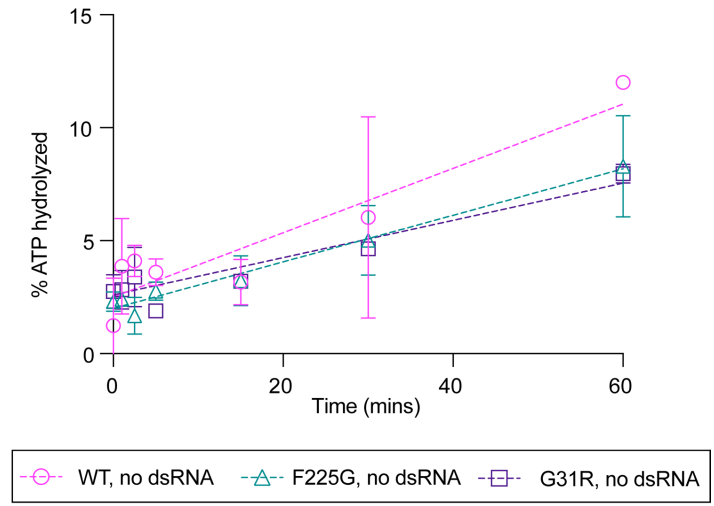

**S6:** ATP hydrolysis without dsRNA: A) PhosphorImages of representative TLC plates show ATP hydrolysis during incubation at 25°C with Dcr-2<sup>WT</sup>, Dcr-2<sup>F225G</sup>, or Dcr-2<sup>G31R</sup>, in the absence of dsRNA. Dcr-2 (200nM) and ATP (100μM), with addition of 100nM of [ $\alpha$ -<sup>32</sup>P] ATP (3000 Ci/mmol) to monitor hydrolysis. B) Quantification of data from panel A.  $n = 3$ , errors bars, SD. Data fit with pseudo first order equation,  $y = y_0 + A (1 + e^{-kt})$ , where  $A$  = amplitude of rate curve,  $y_0$  = baseline ( $\sim 0$ ),  $k = k_{\text{obs}}$  (first order rate constant),  $t$  = time. ATP hydrolysis by Dcr-2 is inefficient without dsRNA (Cenik et al. 2011; Sinha et al. 2015).
