# Supplementary material
Source: HighWire-hosted journal article supplement (doi:10.1101/rna.077289.120)
Supplement: Supplemental_Table_1.pdf [file Supplemental_Table_1.pdf]

Table 2. Primers used for PCR mutagenesis. Nucleotides different from wild-type sequence are in red

|                                              |     |                                          |
|----------------------------------------------|-----|------------------------------------------|
| poly-ubiquitin<br>promotor from<br>DGRC#1282 | FWD | cgctaGCAAACAGCGCTGACTTTGAG               |
|                                              | REV | GGggatccGCCCTTGGATTATTCTGC               |
| GFP N-terminal<br>gateway<br>cassette        | FWD | cggtaCCGGCATGGTGAGCAAGGGCG               |
|                                              | REV | ccagatCTGCAGGTCGACAAAGGTTAAGC            |
| G31R                                         | FWD | TTGTCTACCTGCCACAAGATCTGGGAAAACGTTC       |
|                                              | REV | GAACGTTTTCCAGATCTTGTGGGCAGGTAGACAA       |
| F225G                                        | FWD | CACAGAGGTCATGGTGTCCGGTCCACATCAAGAGCAAGTG |
|                                              | REV | CACTTGCTCTTGATGTGGAACGGACACCATGACCTCTGTG |
