# Supplementary material
Source: HighWire-hosted journal article supplement (doi:10.1101/rna.077289.120)
Supplement: Supplemental_Table_2.pdf [file Supplemental_Table_2.pdf]

Table 3. qPCR primers.

| Tag                    | Strand spec. qPCR | TTGGCATTAAAGGCTATCGG    |
|------------------------|-------------------|-------------------------|
| DCV                    | FWD               | TCATCGGTATGCACATTGCT    |
|                        | REV               | CGCATAACCATGCTCTTCTG    |
| RP49                   | FWD               | GCCGCTTCAAGGGACAGTATCT  |
|                        | REV               | AAACGCGGTTCTGCATGAG     |
| VSV                    | FWD               | CCTTTAGAAGGGAATTGGAAGAA |
|                        | REV               | TCTGCCGACTTGATAGGATTG   |
| dmDcr-2                | FWD               | AAACTGATGCCAGGTGGAAG    |
|                        | REV               | ATTCCCAAACGCTCAACAC     |
| <i>esi-1</i> precursor | FWD               | GGTGCTGCGCATACCTTT      |
|                        | REV               | CAAGGCTAGGGCTCGTCA      |
| <i>esi-2</i> precursor | FWD               | CAAACACCCACACACATACACA  |
|                        | REV               | CCAGGGCGCTACATTCAATA    |
