# Supplementary material
Source: HighWire-hosted journal article supplement (doi:10.1101/rna.077289.120)
Supplement: Supplemental_Table_3.pdf [file Supplemental_Table_3.pdf]

Table 4. Antibody details for Western blot

| Target          | Reference                | Origin | Dilution |
|-----------------|--------------------------|--------|----------|
| dmDcr-2         | ab4732 (Abcam)           | Rabbit | 1:500    |
| R2D2            | ab14750 (Abcam)          | Rabbit | 1:1000   |
| Actin           | MAB1501R (Millipore)     | Mouse  | 1:2000   |
| HRP-Anti-Rabbit | 3918-8816-31 (Millipore) | Goat   | 1:10000  |
| HRP-Anti-Mouse  | NA931 (GE Healthcare)    | Goat   | 1:10000  |
